# Supplementary material for: Balloon-borne measurements of temperature, water vapor, ozone and aerosol backscatter at the southern slopes of the Himalayas during StratoClim 2016-2017
Source: Copernicus journal article supplement (doi:10.5194/acp-2018-222), 2018-04-11
Supplement: Supplementary file 1 [file acp-2018-222-supplement.pdf]

# Balloon-borne measurements of temperature, water vapor, ozone and aerosol backscatter at the southern slopes of the Himalayas during StratoClim 2016-2017

Simone Brunamonti<sup>1</sup>, Teresa Jorge<sup>1</sup>, Peter Oelsner<sup>2</sup>, Sreeharsha Hanumanthu<sup>3,4</sup>, Bhupendra B. Singh<sup>3</sup>, K. Ravi Kumar<sup>3,9</sup>, Sunil Sonbawne<sup>3</sup>, Susanne Meier<sup>2</sup>, Deepak Singh<sup>5</sup>, Frank G. Wienhold<sup>1</sup>, Bei Ping Luo<sup>1</sup>, Maxi Böttcher<sup>1</sup>, Yann Poltera<sup>1</sup>, Hannu Jauhiainen<sup>8</sup>, Rijan Kayastha<sup>6</sup>, Ruud Dirksen<sup>2</sup>, Manish Naja<sup>5</sup>, Markus Rex<sup>7</sup>, Suvarna Fadnavis<sup>3</sup> and Thomas Peter<sup>1</sup>

<sup>1</sup>Institute for Atmospheric and Climate Science (IAC), Swiss Federal Institute of Technology (ETH), Zürich, Switzerland

<sup>2</sup>Deutscher Wetterdienst (DWD) / GCOS Reference Upper Air Network (GRUAN) Lead Center, Lindenberg, Germany

<sup>3</sup>Indian Institute of Tropical Meteorology (IITM), Pune, India

<sup>4</sup>Forschungszentrum Jülich (FZJ), Jülich, Germany

<sup>5</sup>Aryabhata Research Institute of Observational Sciences (ARIES), Nainital, India

<sup>6</sup>Kathmandu University (KU), Dhulikhel, Nepal

<sup>7</sup>Alfred Wegener Institute (AWI) for Polar and Marine Research, Potsdam, Germany

<sup>8</sup>Vaisala Oyj, Vantaa, Finland

<sup>9</sup>Now at King Abdullah University of Science and Technology (KAUST), Thuwal, Saudi Arabia

*Correspondence to:* Simone Brunamonti (simone.brunamonti@env.ethz.ch)

## Supplementary material

| Sound-<br>ing ID | Date            | Time of lau-<br>nch | Radiosonde             | Payload                 | Status / notes | Burst<br>height |
|------------------|-----------------|---------------------|------------------------|-------------------------|----------------|-----------------|
| NT001            | Aug 02,<br>2016 | 18:59 UT            | iMet-1-RSB             | ECC / CFH / CO-<br>BALD | -              | 34.4 km         |
| NT002            | Aug 03,<br>2016 | 15:20 UT            | iMet-1-RSB             | ECC / CFH / CO-<br>BALD | -              | 29.0 km         |
| NT003            | Aug 05,<br>2016 | 17:23 UT            | RS41-SGP /<br>RS92-SGP | ECC / CFH / CO-<br>BALD | Early burst    | 18.6 km         |
| NT004            | Aug 06,<br>2016 | 17:57 UT            | RS41-SGP /<br>RS92-SGP | ECC / CFH / CO-<br>BALD | -              | 34.0 km         |

|       |                 |          |                        |                         |                                  |         |
|-------|-----------------|----------|------------------------|-------------------------|----------------------------------|---------|
| NT005 | Aug 08,<br>2016 | 16:30 UT | RS41-SGP /<br>RS92-SGP | ECC / CFH / CO-<br>BALD | -                                | 30.2 km |
| NT006 | Aug 11,<br>2016 | 05:04 UT | RS41-SGP /<br>RS92-SGP | ECC / CFH               | CFH electronics<br>failure       | 32.8 km |
| NT007 | Aug 11,<br>2016 | 18:57 UT | RS41-SGP /<br>RS92-SGP | ECC / CFH / CO-<br>BALD | ECC failure, CFH<br>contaminated | 32.5 km |
| NT008 | Aug 12,<br>2016 | 04:57 UT | RS41-SGP /<br>RS92-SGP | ECC / CFH               | -                                | 32.0 km |
| NT009 | Aug 12,<br>2016 | 16:20 UT | RS41-SGP /<br>RS92-SGP | ECC / CFH / CO-<br>BALD | Early burst                      | 19.8 km |
| NT010 | Aug 15,<br>2016 | 04:53 UT | RS41-SGP /<br>RS92-SGP | ECC / CFH               | CFH contaminated                 | 29.2 km |
| NT011 | Aug 15,<br>2016 | 16:53 UT | RS41-SGP /<br>RS92-SGP | ECC / CFH / CO-<br>BALD | CFH contaminated                 | 26.7 km |
| NT012 | Aug 16,<br>2016 | 03:43 UT | RS41-SGP /<br>RS92-SGP | ECC / CFH               | -                                | 31.0 km |
| NT013 | Aug 16,<br>2016 | 18:27 UT | RS41-SGP /<br>RS92-SGP | ECC / CFH / CO-<br>BALD | Launch failure<br>(early burst)  | 2.7 km  |
| NT014 | Aug 17,<br>2016 | 10:10 UT | RS41-SGP /<br>RS92-SGP | ECC / CFH               | -                                | 33.0 km |
| NT015 | Aug 17,<br>2016 | 15:30 UT | RS41-SGP /<br>RS92-SGP | ECC / CFH / CO-<br>BALD | -                                | 32.7 km |
| NT016 | Aug 18,<br>2016 | 06:28 UT | RS41-SGP /<br>RS92-SGP | ECC / CFH               | -                                | 29.6 km |
| NT017 | Aug 18,<br>2016 | 16:04 UT | RS41-SGP /<br>RS92-SGP | ECC / CFH / CO-<br>BALD | -                                | 33.9 km |
| NT018 | Aug 19,<br>2016 | 17:28 UT | RS41-SGP /<br>RS92-SGP | ECC / CFH / CO-<br>BALD | -                                | 33.0 km |

|       |                 |          |                        |                         |                           |         |
|-------|-----------------|----------|------------------------|-------------------------|---------------------------|---------|
| NT019 | Aug 20,<br>2016 | 03:23 UT | RS41-SGP /<br>RS92-SGP | ECC / CFH               | -                         | 33.4 km |
| NT020 | Aug 20,<br>2016 | 07:19 UT | RS41-SGP /<br>RS92-SGP | CFH                     | -                         | 31.2 km |
| NT021 | Aug 21,<br>2016 | 03:35 UT | RS41-SGP /<br>RS92-SGP | ECC / CFH               | -                         | 32.3 km |
| NT022 | Aug 21,<br>2016 | 07:12 UT | RS41-SGP /<br>RS92-SGP | None                    | Early burst               | 18.6 km |
| NT023 | Aug 21,<br>2016 | 15:51 UT | RS41-SGP /<br>RS92-SGP | ECC / CFH / CO-<br>BALD | -                         | 33.0 km |
| NT024 | Aug 22,<br>2016 | 04:21 UT | RS41-SGP /<br>RS92-SGP | ECC                     | ECC battery failure       | 33.6 km |
| NT025 | Aug 23,<br>2016 | 16:33 UT | RS41-SGP /<br>RS92-SGP | ECC / CFH / CO-<br>BALD | -                         | 32.1 km |
| NT026 | Aug 24,<br>2016 | 06:03 UT | RS41-SGP /<br>RS92-SGP | ECC / CFH               | -                         | 29.6 km |
| NT027 | Aug 26,<br>2016 | 18:18 UT | RS41-SGP /<br>RS92-SGP | ECC / CFH / CO-<br>BALD | -                         | 33.0 km |
| NT028 | Aug 28,<br>2016 | 16:11 UT | RS41-SGP /<br>RS92-SGP | ECC / CFH / CO-<br>BALD | -                         | 33.9 km |
| NT029 | Aug 30,<br>2016 | 15:44 UT | RS41-SGP /<br>RS92-SGP | ECC / CFH / CO-<br>BALD | CFH contaminated          | 31.3 km |
| NT030 | Aug 31,<br>2016 | 05:58 UT | RS41-SGP /<br>RS92-SGP | ECC / CFH               | CFH contaminated          | 33.0 km |
| NT031 | Nov 08,<br>2016 | 18:50 UT | RS41-SGP /<br>RS92-SGP | ECC / CFH / CO-<br>BALD | COBALD battery<br>failure | 32.7 km |
| NT032 | Nov 10,<br>2016 | 06:56 UT | RS41-SGP /<br>RS92-SGP | ECC / CFH               | -                         | 31.5 km |

|       |                 |          |                        |                         |                                   |         |
|-------|-----------------|----------|------------------------|-------------------------|-----------------------------------|---------|
| NT033 | Nov 10,<br>2016 | 14:44 UT | RS41-SGP /<br>RS92-SGP | ECC / CFH / CO-<br>BALD | -                                 | 32.4 km |
| NT034 | Nov 11,<br>2016 | 15:37 UT | RS41-SGP /<br>RS92-SGP | ECC / CFH / CO-<br>BALD | -                                 | 32.1 km |
| NT035 | Nov 12,<br>2016 | 07:27 UT | RS41-SGP /<br>RS92-SGP | ECC / CFH               | CFH contaminated                  | 30.1 km |
| DK001 | Jul 30,<br>2017 | 18:27 UT | RS41-SGP /<br>RS92-SGP | ECC / COBALD            | -                                 | 34.8 km |
| DK002 | Jul 31,<br>2017 | 18:40 UT | RS41-SGP /<br>RS92-SGP | ECC / COBALD            | -                                 | 25.5 km |
| DK003 | Aug 2,<br>2017  | 18:48 UT | RS41-SGP /<br>RS92-SGP | ECC                     | Early burst                       | 18.0 km |
| DK004 | Aug 3,<br>2017  | 19:36 UT | RS41-SGP /<br>RS92-SGP | ECC / CFH / CO-<br>BALD | -                                 | 32.8 km |
| DK005 | Aug 4,<br>2017  | 18:18 UT | RS41-SGP /<br>RS92-SGP | ECC / CFH               | CFH contamin-ated,<br>early burst | 22.7 km |
| DK006 | Aug 5,<br>2017  | 18:09 UT | RS41-SGP /<br>RS92-SGP | ECC / CFH               | ECC failure                       | 35.0 km |
| DK007 | Aug 6,<br>2017  | 04:22 UT | RS41-SGP /<br>RS92-SGP | -                       | -                                 | 33.5 km |
| DK008 | Aug 6,<br>2017  | 07:40 UT | RS41-SGP /<br>RS92-SGP | -                       | -                                 | 34.8 km |
| DK009 | Aug 6,<br>2017  | 18:44 UT | RS41-SGP /<br>RS92-SGP | ECC / CFH               | ECC failure CFH<br>contaminated   | 27.8 km |
| DK010 | Aug 7,<br>2017  | 16:45 UT | RS41-SGP /<br>RS92-SGP | ECC / CFH               | -                                 | 34.4 km |
| DK011 | Aug 8,<br>2017  | 04:55 UT | RS41-SGP /<br>RS92-SGP | -                       | -                                 | 26.9 km |

|       |                 |          |                        |           |             |         |
|-------|-----------------|----------|------------------------|-----------|-------------|---------|
| DK012 | Aug 8,<br>2017  | 06:49 UT | RS41-SGP /<br>RS92-SGP | -         | -           | 33.8 km |
| DK013 | Aug 8,<br>2017  | 10:20 UT | RS41-SGP /<br>RS92-SGP | ECC / CFH | -           | 32.4 km |
| DK014 | Aug 9,<br>2017  | 03:51 UT | RS41-SGP /<br>RS92-SGP | -         | -           | 36.9 km |
| DK015 | Aug 9,<br>2017  | 07:18 UT | RS41-SGP /<br>RS92-SGP | -         | -           | 35.3 km |
| DK016 | Aug 9,<br>2017  | 16:49 UT | RS41-SGP /<br>RS92-SGP | ECC / CFH | Early burst | 19.0 km |
| DK017 | Aug 10,<br>2017 | 03:13 UT | RS41-SGP /<br>RS92-SGP | -         | -           | 33.6 km |
| DK018 | Aug 10,<br>2017 | 05:16 UT | RS41-SGP /<br>RS92-SGP | -         | -           | 35.9 km |
| DK019 | Aug 10,<br>2017 | 07:33 UT | RS41-SGP /<br>RS92-SGP | -         | -           | 36.5 km |
| DK020 | Aug 10,<br>2017 | 16:29 UT | RS41-SGP /<br>RS92-SGP | ECC / CFH | Early burst | 18.0 km |
| DK021 | Aug 11,<br>2017 | 02:51 UT | RS41-SGP /<br>RS92-SGP | -         | -           | 35.6 km |
| DK022 | Aug 11,<br>2017 | 05:30 UT | RS41-SGP /<br>RS92-SGP | -         | -           | 32.5 km |
| DK023 | Aug 11,<br>2017 | 07:37 UT | RS41-SGP /<br>RS92-SGP | -         | -           | 33.2 km |
| DK024 | Aug 11,<br>2017 | 11:51 UT | RS41-SGP /<br>RS92-SGP | ECC / CFH | -           | 33.5 km |

|       |              |          |                     |     |                                                |         |
|-------|--------------|----------|---------------------|-----|------------------------------------------------|---------|
| DK025 | Aug 12, 2017 | 05:44 UT | RS41-SGP / RS92-SGP | -   | Telemetry issues, sounding terminated manually | Unknown |
| DK026 | Aug 12, 2017 | 08:18 UT | RS41-SGP / RS92-SGP | -   | -                                              | 26.8 km |
| DK027 | Aug 12, 2017 | 11:36 UT | RS41-SGP / RS92-SGP | CFH | CFH contaminated                               | 31.8 km |
| DK028 | Aug 12, 2017 | 16:53 UT | RS41-SGP            | CFH | Early burst, CFH contaminated                  | 22.3 km |

**Table S1. List of all balloon soundings performed, including sounding identifier (ID), date and time of launch, radiosondes and payload used, status / notes (instrumental malfunctionings), and burst altitude. The sounding ID is composed of the station abbreviation (NT for Nainital, India; DK for Dhulikhel, Nepal) and sounding chronological number. Exact coordinates (latitude, longitude) of the sounding stations were, in NT: 29.3554°N, 79.4619°E; in DK: 27.6193°N, 85.5386°E.**

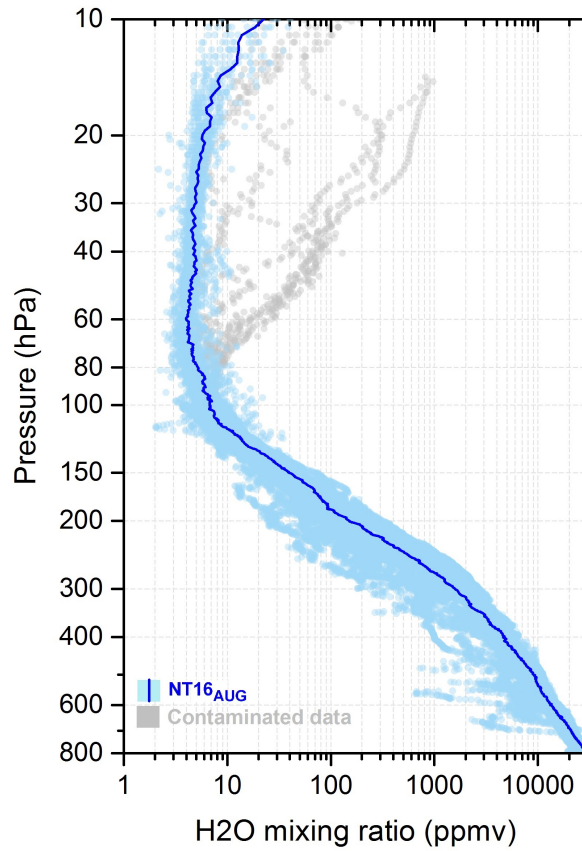

**Figure S1.** All measurements of  $\text{H}_2\text{O}$  mixing ratio by CFH of the NT16<sub>AUG</sub> campaign. Blue dots: data points used for the analysis. Grey dots: measurements showing CFH contamination (as described in Section 2). Blue solid line: mean profile of the data points used for the analysis. Contaminated measurements are detected using a threshold of 10 ppmv in the stratosphere, and the onset of contamination is inferred as the lowest altitude where the measurement deviates significantly from the mean profile. Increased  $\text{H}_2\text{O}$  mixing ratio in all measurements above 20 hPa is likely due to outgassing from the balloon skin and the payload train (discussed in Section 3.3).

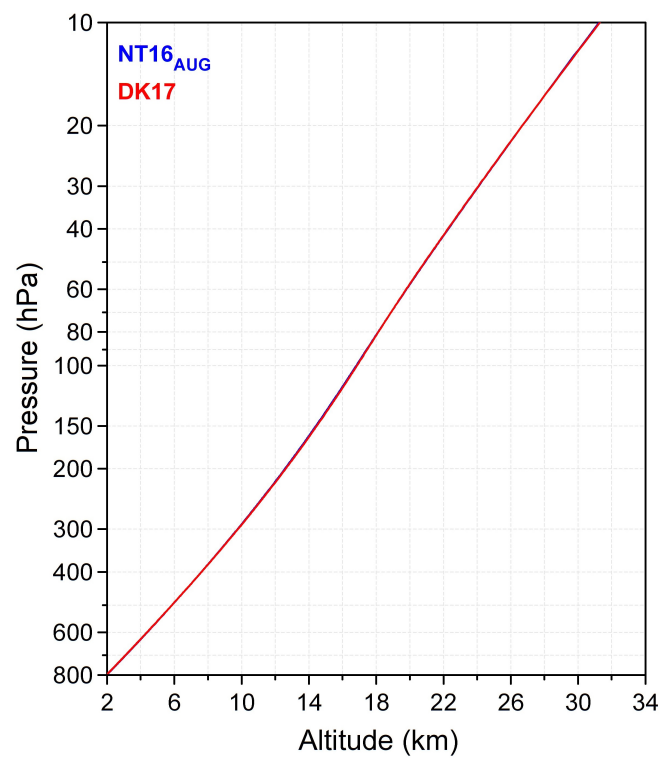

**Figure S2.** Mean profiles of altitude as a function of pressure from RS41-SGP measurements of the NT16<sub>AUG</sub> (blue) and DK17 (red) campaigns.



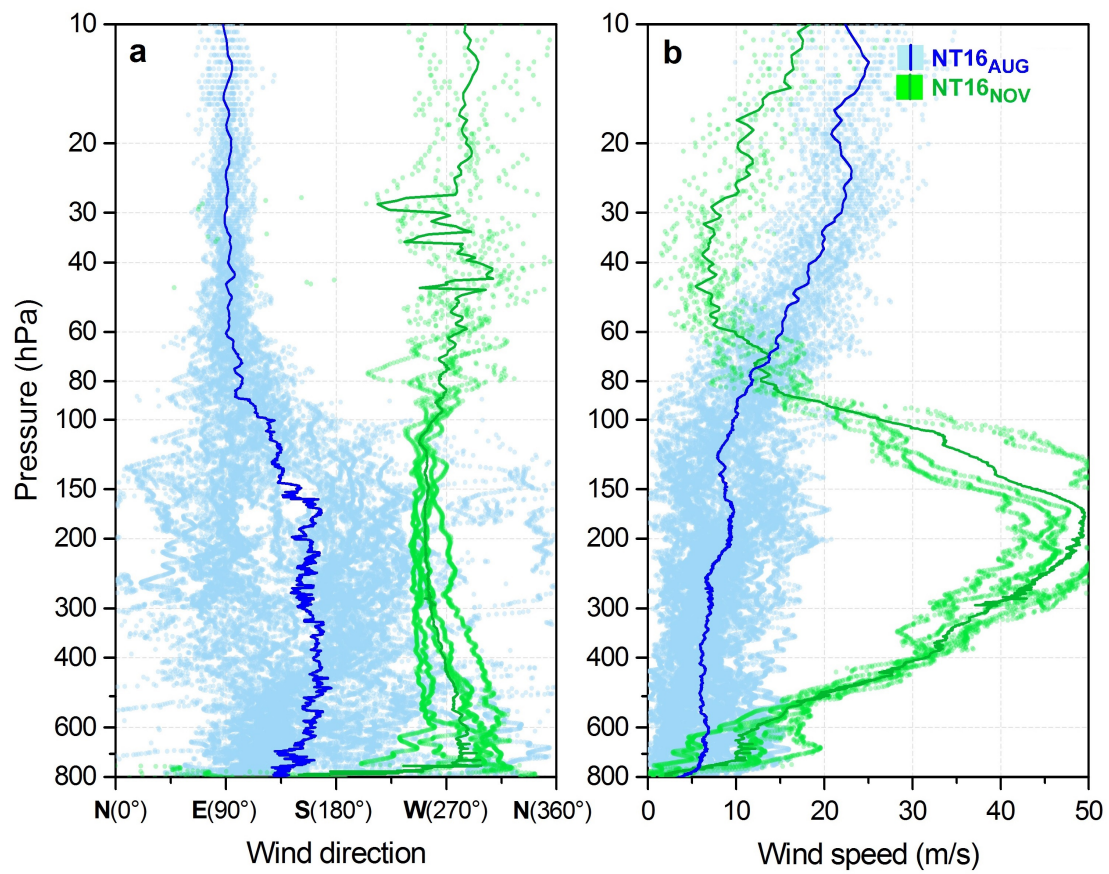

**Figure S3.** All measurements (dots) and mean profiles (solid lines) of wind direction (Panel a) and wind speed (b) as a function of pressure, measured by RS41-SGP during the NT16<sub>AUG</sub> (blue) and NT16<sub>NOV</sub> (green) campaigns.

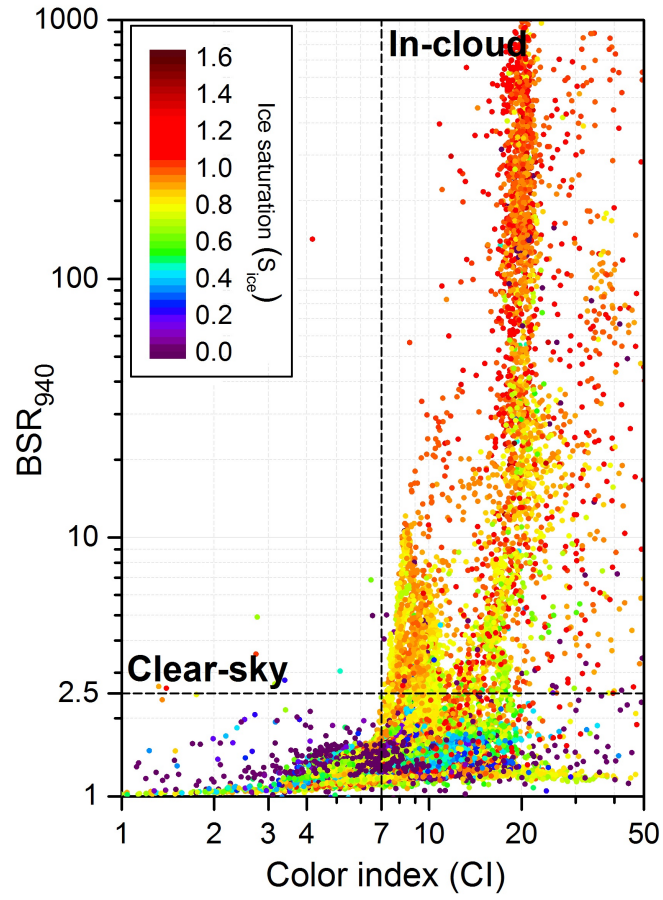

**Figure S4.** All measurements of the NT16<sub>AUG</sub> campaign (dots), shown as a scatter plot of BSR at 940 nm ( $BSR_{940}$ ) as a function of color index (CI), color-coded with ice saturation ( $S_{ice}$ ). Dashed lines show the  $BSR_{940} = 2.5$  and  $CI = 7$  isolines, which are the optical thresholds used for cloud-filtering (discussed in Section 6.2).
